# Supplementary material
Source: publisher figshare collection journal article supplement (https://acs.figshare.com/ndownloader/files/3827656)
Supplement: Supplementary file 1 [file 3827656]

# Supporting Information

## Multiscale Ommatidial Arrays with Broadband and Omnidirectional Antireflection and Antifogging Properties by Sacrificial Layer Mediated Nanoimprinting

Hemant Kumar Raut,<sup>1,2,7\*\*</sup> Saman Safari Dinachali,<sup>2,7</sup> Yee Chong Loke,<sup>2</sup> Ramakrishnan Ganesan,<sup>4</sup> Kwadwo Konadu Ansah-Antwi,<sup>2,5</sup> Aleksander Góra,<sup>1,3</sup> Eng Huat Khoo,<sup>6</sup> V. Anand Ganesh,<sup>7</sup> Mohammad S. M. Saifullah,<sup>2\*</sup> Seeram Ramakrishna<sup>1,3</sup>

<sup>1</sup> Department of Mechanical Engineering, National University of Singapore, Singapore 117574, Republic of Singapore

<sup>2</sup> Institute of Materials Research and Engineering, A\*STAR (Agency for Science, Technology and Research), 3 Research Link, Singapore 117602, Republic of Singapore

<sup>3</sup> Centre for Nanofibres and Nanotechnology, National University of Singapore, Nanoscience and Nanotechnology Initiative, 2 Engineering Drive 3, Singapore 117576, Republic of Singapore

<sup>4</sup> Department of Chemistry, Birla Institute of Technology & Science, Pilani–Hyderabad Campus, Jawahar Nagar, Shameerpet Mandal, Hyderabad 500 078, Telangana, India

<sup>5</sup> Department of Electrical and Computer Engineering, National University of Singapore, Singapore 117574, Republic of Singapore

<sup>6</sup> Electronics and Photonics Department, Institute of High Performance Computing, A\*STAR (Agency for Science, Technology and Research), 1 Fusionopolis Way, Connexis, Singapore 138632, Republic of Singapore

<sup>7</sup> Division of Engineering Product Development, Singapore University of Technology and Design, 8 Somapah Rd, 487372, Republic of Singapore

---

\* Corresponding authors' email addresses: [hemant\\_raut@sutd.edu.sg](mailto:hemant_raut@sutd.edu.sg), [saifullahm@imre.a-star.edu.sg](mailto:saifullahm@imre.a-star.edu.sg)

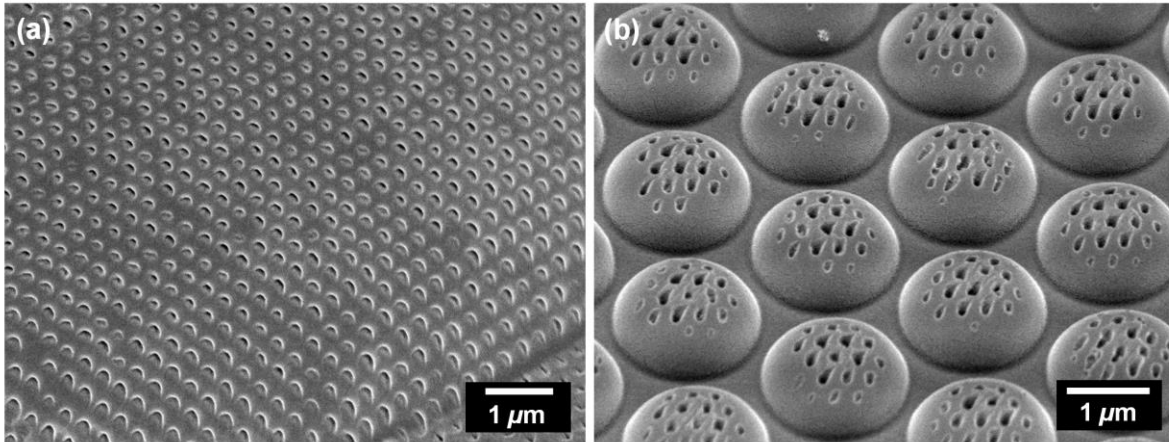

**Figure S1** (a) AR nanostructures buckled and deformed after imprinting of microlens, without a sacrificial layer to secure the nanostructure arrays (b) A conventional, direct imprinting approach involving imprinting of AR nanostructures atop previously imprinted microlens arrays that could not fully replicate the nanostructure arrays.

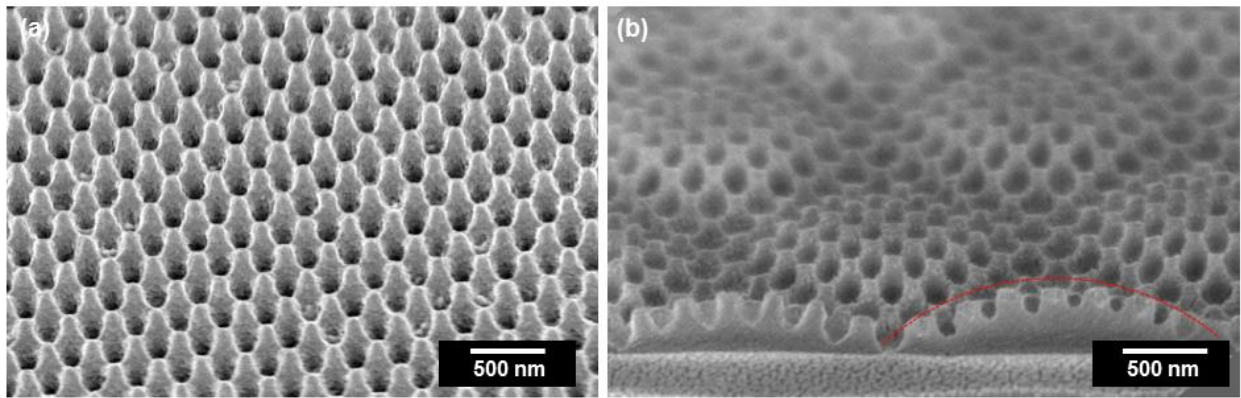

**Figure S2** (a) AR nanostructures in a 2-dimesnional plane as imprinted on a planar thermoplastic film. (b) Cross-sectional SEM image of the AR nanostructures on the 3-dimensional microlens array after fabrication through the SLAN methodology.

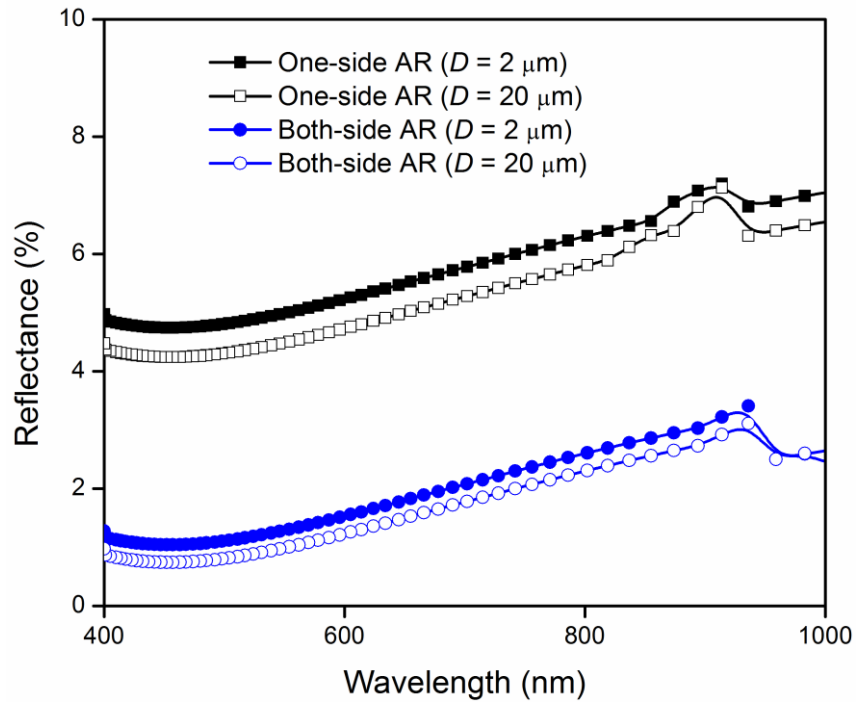

**Figure S3** Finite-difference time domain simulations showing the reflectance obtained for multiscale ommatidial arrays of diameter  $2 \mu\text{m}$  and  $20 \mu\text{m}$ .

Table ST1 Design parameters of the microlenses in the multiscale ommatidial arrays

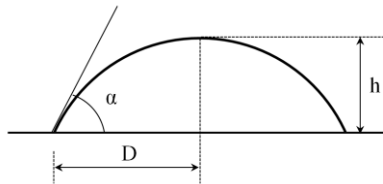

D = Diameter of the ommatidia

h = Height of the ommatidia

$\alpha$  = Contact angle of the ommatidia

| Type                                         | D  | h   | $\alpha$ |
|----------------------------------------------|----|-----|----------|
| 2 $\mu\text{m}$ multiscale ommatidial array  | 2  | 0.4 | 40       |
| 20 $\mu\text{m}$ multiscale ommatidial array | 20 | 3.0 | 36       |
